# Supplementary material for: Apolipoprotein A‐IV concentrations and clinical outcomes in a large chronic kidney disease cohort: Results from the GCKD study
Source: PubMed Central journal article supplement (PMC9305919; doi:10.1111/joim.13437), 2022-01-04
Supplement: JOIM-291-622-s001.pdf [file JOIM-291-622-s001.pdf]

# Supplementary Tables to

## Apolipoprotein A-IV concentrations and clinical outcomes in a large chronic kidney disease cohort: results from the GCKD study

Johannes P. Schwaiger <sup>1,2</sup>, Barbara Kollerits <sup>1</sup>, Inga Steinbrenner <sup>3</sup>, Hansi Weissensteiner <sup>1</sup>,  
Sebastian Schönherr <sup>1</sup>, Lukas Forer <sup>1</sup>, Fruzsina Kotsis <sup>3,5</sup>, Claudia Lamina <sup>1</sup>,  
Markus P. Schneider <sup>4</sup>, Ulla T. Schultheiss <sup>3,5</sup>, Christoph Wanner <sup>6</sup>, Anna Köttgen <sup>3</sup>,  
Kai-Uwe Eckardt <sup>4,7</sup>, Florian Kronenberg <sup>1</sup>; for the GCKD Investigators

- <sup>1</sup> Institute of Genetic Epidemiology, Medical University of Innsbruck, Innsbruck, Austria
- <sup>2</sup> Department of Internal Medicine, Landeskrankenhaus Hall i.T., Hall i.T., Austria
- <sup>3</sup> Institute of Genetic Epidemiology, Faculty of Medicine and Medical Center - University of Freiburg, Freiburg, Germany
- <sup>4</sup> Department of Nephrology and Hypertension, University Hospital Erlangen, Friedrich-Alexander-Universität Erlangen-Nürnberg, Erlangen, Germany and German Chronic Kidney Disease study
- <sup>5</sup> Department of Medicine IV – Nephrology and Primary Care, Faculty of Medicine and Medical Center - University of Freiburg, Freiburg, Germany
- <sup>6</sup> Division of Nephrology, Department of Internal Medicine I, University Hospital Würzburg, Würzburg, Germany
- <sup>7</sup> Department of Nephrology and Medical Intensive Care, Charité – Universitätsmedizin Berlin, Berlin, Germany

### Corresponding author:

Florian Kronenberg, MD  
Institute of Genetic Epidemiology  
Department of Genetics and Pharmacology  
Medical University of Innsbruck  
Schöpfstrasse 41, A-6020 Innsbruck, Austria.  
Phone: (+43) 512-9003-70560  
Fax: (+43) 512 9003-73560 or -73561,  
Email: [Florian.Kronenberg@i-med.ac.at](mailto:Florian.Kronenberg@i-med.ac.at)

**Supplementary Table 1:** Association of apolipoprotein A-IV with prevalent cardiovascular disease. Data are as in model 2 from Table 3 but additionally adjusted for hs-CRP.

|                                                                      | OR   | 95% CI      | p-value            |
|----------------------------------------------------------------------|------|-------------|--------------------|
| <b>Calculations per 10 mg/dL increment of apoA-IV concentrations</b> |      |             |                    |
|                                                                      | 0.83 | (0.76-0.91) | 8x10 <sup>-5</sup> |
| <b>Calculations per quartile of ApoA-IV concentrations</b>           |      |             |                    |
| Quartile 1                                                           | 1.00 |             |                    |
| Quartile 2                                                           | 0.84 | (0.68-1.03) | 0.10               |
| Quartile 3                                                           | 0.93 | (0.76-1.15) | 0.51               |
| Quartile 4                                                           | 0.71 | (0.56-0.89) | 0.004              |

OR, Odds ratio; CI, confidence interval

Data are adjusted for age, sex, eGFR, ln-UACR, serum albumin, LDL cholesterol, smoking status, diabetes mellitus, statin use, ln-triglycerides, BMI, systolic and diastolic blood pressure and ln-hs-CRP

Prevalent cardiovascular disease was defined as myocardial infarction, coronary artery bypass grafting, percutaneous transluminal coronary angioplasty, stroke, interventions at the carotid arteries.

**Supplementary Table 2:** Association of apolipoprotein A-IV with outcomes during the prospective follow-up. Data are as in model 2 from Table 4 but additionally adjusted for hs-CRP.

| Endpoints                                      | For each increase of apoA-IV by 10 mg/dL |         |
|------------------------------------------------|------------------------------------------|---------|
|                                                | HR (95% CI)                              | p-value |
| All-cause mortality                            | 0.87 (0.78-0.97)                         | 0.009   |
| Non-cardiovascular mortality                   | 0.82 (0.73-0.93)                         | 0.002   |
| 3-point-MACE                                   | 0.93 (0.83-1.04)                         | 0.21    |
| 4-point-MACE                                   | 0.94 (0.85-1.03)                         | 0.18    |
| Death and hospitalization due to heart failure | 0.91 (0.79-1.04)                         | 0.16    |

HR, hazard ratio; CI, confidence interval

Data are adjusted for age, sex, eGFR, ln-UACR, serum albumin, LDL cholesterol, smoking status, diabetes mellitus, statin use, ln-triglycerides, BMI, systolic and diastolic blood pressure, cardiovascular disease at baseline and ln-hs-CRP.

3-point-MACE (Major Adverse Cardiovascular Events) was defined as acute myocardial infarction (STEMI and NSTEMI), non-fatal stroke, fatal myocardial infarction, fatal coronary heart disease, sudden cardiac death, death from congestive heart failure and death due to non-hemorrhagic stroke;

4-point-MACE comprised all endpoints included in 3-point-MACE plus fatal peripheral ischemia, amputation due to peripheral vascular disease, surgical or percutaneous revascularization due to peripheral vascular disease

Hospitalization due to heart failure was defined as follows: hospitalization with either evidence of a reduced left ventricular ejection fraction (< 35%) or radiological evidence of pulmonary venous congestion, alveolar edema or presence of bilateral or right-sided pleural effusion with a presumed cardiac cause.

**Supplementary Table 3:** Association of apolipoprotein A-IV with outcomes during the prospective follow-up in patients free of cardiovascular disease at the time of enrollment (n=3,852 out of 5,141). Data are adjusted for age, sex, eGFR, ln-UACR, serum albumin, LDL cholesterol, smoking status, diabetes mellitus, statin use, ln-triglycerides, BMI, systolic and diastolic blood pressure.

| Endpoints (n of events)                                | For each increase of apoA-IV by 10 mg/dL |         |
|--------------------------------------------------------|------------------------------------------|---------|
|                                                        | HR (95% CI)                              | p-value |
| All-cause mortality (n=300)                            | 0.84 (0.73-0.96)                         | 0.009   |
| Non-cardiovascular mortality (n=233)                   | 0.78 (0.66-0.91)                         | 0.002   |
| 3-point-MACE (n=235)                                   | 0.85 (0.73-0.99)                         | 0.04    |
| 4-point-MACE (n=321)                                   | 0.88 (0.78-1.01)                         | 0.06    |
| Death and hospitalization due to heart failure (n=159) | 0.87 (0.72-1.05)                         | 0.15    |

HR, hazard ratio; CI, confidence interval

3-point-MACE (Major Adverse Cardiovascular Events) was defined as acute myocardial infarction (STEMI and NSTEMI), non-fatal stroke, fatal myocardial infarction, fatal coronary heart disease, sudden cardiac death, death from congestive heart failure and death due to non-hemorrhagic stroke;

4-point-MACE comprised all endpoints included in 3-point-MACE plus fatal peripheral ischemia, amputation due to peripheral vascular disease, surgical or percutaneous revascularization due to peripheral vascular disease

Hospitalization due to heart failure was defined as follows: hospitalization with either evidence of a reduced left ventricular ejection fraction (< 35%) or radiological evidence of pulmonary venous congestion, alveolar edema or presence of bilateral or right-sided pleural effusion with a presumed cardiac cause.

**Supplementary Table 4:** Association of apolipoprotein A-IV with outcomes during the prospective follow-up based on subdistribution hazard ratio (SHR) models

| Adjustment model                                                | For each increase of apoA-IV by 10 mg/dL |         |
|-----------------------------------------------------------------|------------------------------------------|---------|
|                                                                 | SHR (95% CI)                             | p-value |
| <b>Non-cardiovascular mortality (n=433)*</b>                    |                                          |         |
| Model 1                                                         | 0.80 (0.71-0.91)                         | 0.0009  |
| Model 2                                                         | 0.77 (0.68-0.87)                         | 0.00005 |
| <b>3-point-MACE (n=506) *</b>                                   |                                          |         |
| Model 1                                                         | 0.91 (0.82-1.01)                         | 0.09    |
| Model 2                                                         | 0.91 (0.81-1.02)                         | 0.097   |
| <b>4-point-MACE (n=681) *</b>                                   |                                          |         |
| Model 1                                                         | 0.92 (0.84-1.01)                         | 0.09    |
| Model 2                                                         | 0.91 (0.83-1.00)                         | 0.05    |
| <b>Death and hospitalization due to heart failure (n=346) *</b> |                                          |         |
| Model 1                                                         | 0.86 (0.74-0.99)                         | 0.03    |
| Model 2                                                         | 0.88 (0.76-1.01)                         | 0.06    |

CI, confidence interval

\* Number of events refer to model 1.

Model 1: adjusted for age, sex, eGFR, ln-UACR;

Model 2: as model 1 plus serum albumin, LDL cholesterol, smoking status, diabetes mellitus, statin use, ln-triglycerides, BMI, systolic and diastolic blood pressure and cardiovascular disease at baseline

3-point-MACE (Major Adverse Cardiovascular Events) was defined as acute myocardial infarction (STEMI and NSTEMI), non-fatal stroke, fatal myocardial infarction, fatal coronary heart disease, sudden cardiac death, death from congestive heart failure and death due to non-hemorrhagic stroke;

4-point-MACE comprised all endpoints included in 3-point-MACE plus fatal peripheral ischemia, amputation due to peripheral vascular disease, surgical or percutaneous revascularization due to peripheral vascular disease

Hospitalization due to heart failure was defined as follows: hospitalization with either evidence of a reduced left ventricular ejection fraction (< 35%) or radiological evidence of pulmonary venous congestion, alveolar edema or presence of bilateral or right-sided pleural effusion with a presumed cardiac cause.

**Supplementary Table 5:** Association of apolipoprotein A-IV with outcomes during the prospective follow-up when data are additionally adjusted for HDL cholesterol concentrations. For better comparison data from model 2 given in Table 4 of the main manuscript are added to this table.

| Adjustment model                                      | For each increase of apoA-IV by 10 mg/dL |          |
|-------------------------------------------------------|------------------------------------------|----------|
|                                                       | HR (95% CI)                              | p-value  |
| <b>All-cause mortality</b>                            |                                          |          |
| Model 2 from Table 4                                  | 0.81 (0.73-0.89)                         | 0.00005  |
| Model 2 + HDL cholesterol                             | 0.81 (0.73-0.90)                         | 0.000098 |
| <b>Non-cardiovascular mortality</b>                   |                                          |          |
| Model 2 from Table 4                                  | 0.76 (0.68-0.86)                         | 0.00001  |
| Model 2 + HDL cholesterol                             | 0.75 (0.66-0.85)                         | 0.000005 |
| <b>3-point-MACE</b>                                   |                                          |          |
| Model 2 from Table 4                                  | 0.88 (0.79-0.99)                         | 0.03     |
| Model 2 + HDL cholesterol                             | 0.92 (0.82-1.03)                         | 0.14     |
| <b>4-point-MACE</b>                                   |                                          |          |
| Model 2 from Table 4                                  | 0.88 (0.80-0.97)                         | 0.01     |
| Model 2 + HDL cholesterol                             | 0.91 (0.83-1.01)                         | 0.07     |
| <b>Death and hospitalization due to heart failure</b> |                                          |          |
| Model 2 from Table 4                                  | 0.83 (0.72-0.95)                         | 0.006    |
| Model 2 + HDL cholesterol                             | 0.85 (0.74-0.98)                         | 0.02     |

HR, hazard ratio; CI, confidence interval

Model 2: taken from Table 4 and is adjusted for age, sex, estimated glomerular filtration rate, ln-urine albumin-creatinine ratio, serum albumin, LDL cholesterol, smoking status, diabetes mellitus, statin use, ln-triglycerides, body mass index, systolic and diastolic blood pressure and cardiovascular disease at baseline

Model 2 + HDL cholesterol: additional adjustment for HDL cholesterol

3-point-MACE (Major Adverse Cardiovascular Events) was defined as acute myocardial infarction (STEMI and NSTEMI), non-fatal stroke, fatal myocardial infarction, fatal coronary heart disease, sudden cardiac death, death from congestive heart failure and death due to non-hemorrhagic stroke;

4-point-MACE comprised all endpoints included in 3-point-MACE plus fatal peripheral ischemia, amputation due to peripheral vascular disease, surgical or percutaneous revascularization due to peripheral vascular disease

Hospitalization due to heart failure was defined as follows: hospitalization with either evidence of a reduced left ventricular ejection fraction (< 35%) or radiological evidence of pulmonary venous congestion, alveolar edema or presence of bilateral or right-sided pleural effusion with a presumed cardiac cause.

**Supplementary Table 6:** Association of apolipoprotein A-IV with outcomes during the prospective follow-up including time-updated covariables for eGFR, UACR, BMI, triglycerides, LDL cholesterol, serum albumin, systolic and diastolic blood pressure and statins from follow-up examinations two, three and four years after baseline.

| Adjustment model                                                | For each increase of apoA-IV by 10 mg/dL |         |
|-----------------------------------------------------------------|------------------------------------------|---------|
|                                                                 | HR (95% CI)                              | p-value |
| <b>All-cause mortality (n=606) *</b>                            |                                          |         |
| Model 1                                                         | 0.83 (0.75-0.91)                         | 0.0006  |
| Model 2                                                         | 0.80 (0.72-0.88)                         | 0.00001 |
| <b>Non-cardiovascular mortality (n=438) *</b>                   |                                          |         |
| Model 1                                                         | 0.81 (0.72-0.92)                         | 0.001   |
| Model 2                                                         | 0.77 (0.69-0.87)                         | 0.00003 |
| <b>3-point-MACE (n=510) *</b>                                   |                                          |         |
| Model 1                                                         | 0.89 (0.80-0.99)                         | 0.03    |
| Model 2                                                         | 0.86 (0.77-0.96)                         | 0.008   |
| <b>4-point-MACE (n=686) *</b>                                   |                                          |         |
| Model 1                                                         | 0.89 (0.81-0.97)                         | 0.01    |
| Model 2                                                         | 0.86 (0.78-0.94)                         | 0.002   |
| <b>Death and hospitalization due to heart failure (n=350) *</b> |                                          |         |
| Model 1                                                         | 0.76 (0.67-0.87)                         | 0.0002  |
| Model 2                                                         | 0.75 (0.66-0.86)                         | 0.00004 |

HR, hazard ratio; CI, confidence interval

\* Number of events refer to model 1.

Model 1: adjusted for age, sex, estimated glomerular filtration rate (longitudinal), ln- urine albumin-creatinine ratio (longitudinal);

Model 2: as model 1 plus serum albumin (longitudinal), LDL cholesterol (longitudinal), smoking status, diabetes mellitus, statin use (longitudinal), ln-triglycerides (longitudinal), body mass index (longitudinal), systolic and diastolic blood pressure (longitudinal) and cardiovascular disease at baseline

3-point-MACE (Major Adverse Cardiovascular Events) was defined as acute myocardial infarction (STEMI and NSTEMI), non-fatal stroke, fatal myocardial infarction, fatal coronary heart disease, sudden cardiac death, death from congestive heart failure and death due to non-hemorrhagic stroke;

4-point-MACE comprised all endpoints included in 3-point-MACE plus fatal peripheral ischemia, amputation due to peripheral vascular disease, surgical or percutaneous revascularization due to peripheral vascular disease

Hospitalization due to heart failure was defined as follows: hospitalization with either evidence of a reduced left ventricular ejection fraction (< 35%) or radiological evidence of pulmonary venous congestion, alveolar edema or presence of bilateral or right-sided pleural effusion with a presumed cardiac cause.
